# Supplementary material
Source: Springer Nature journal article supplement (https://www.springermedizin.de/resource/supplementary/12931_2013_1390_MOESM4_ESM.pdf/9426154)
Supplement: MOESM4 [file 9426154]

Number of events

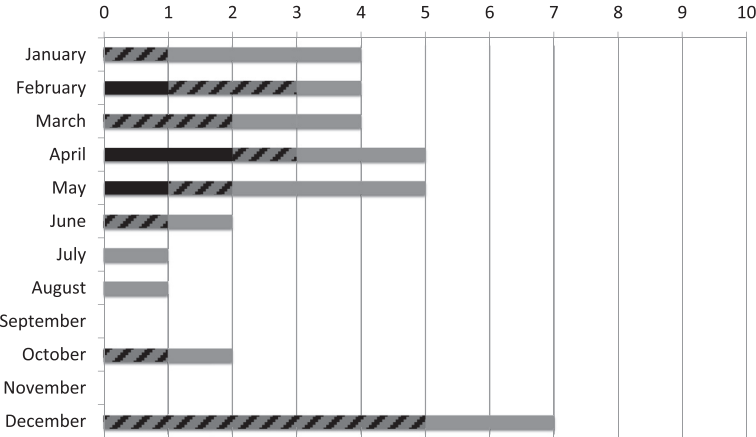

Definite Acute Exacerbation
  Suspected Acute Exacerbation
  Other Acute Worsening
